# Supplementary material for: Human regulatory proteins associate with non-coding RNAs from the EBV IR1 region
Source: PubMed Central journal article supplement (PMC5819218; doi:10.1186/s13104-018-3250-8), 2018-02-20

binding site

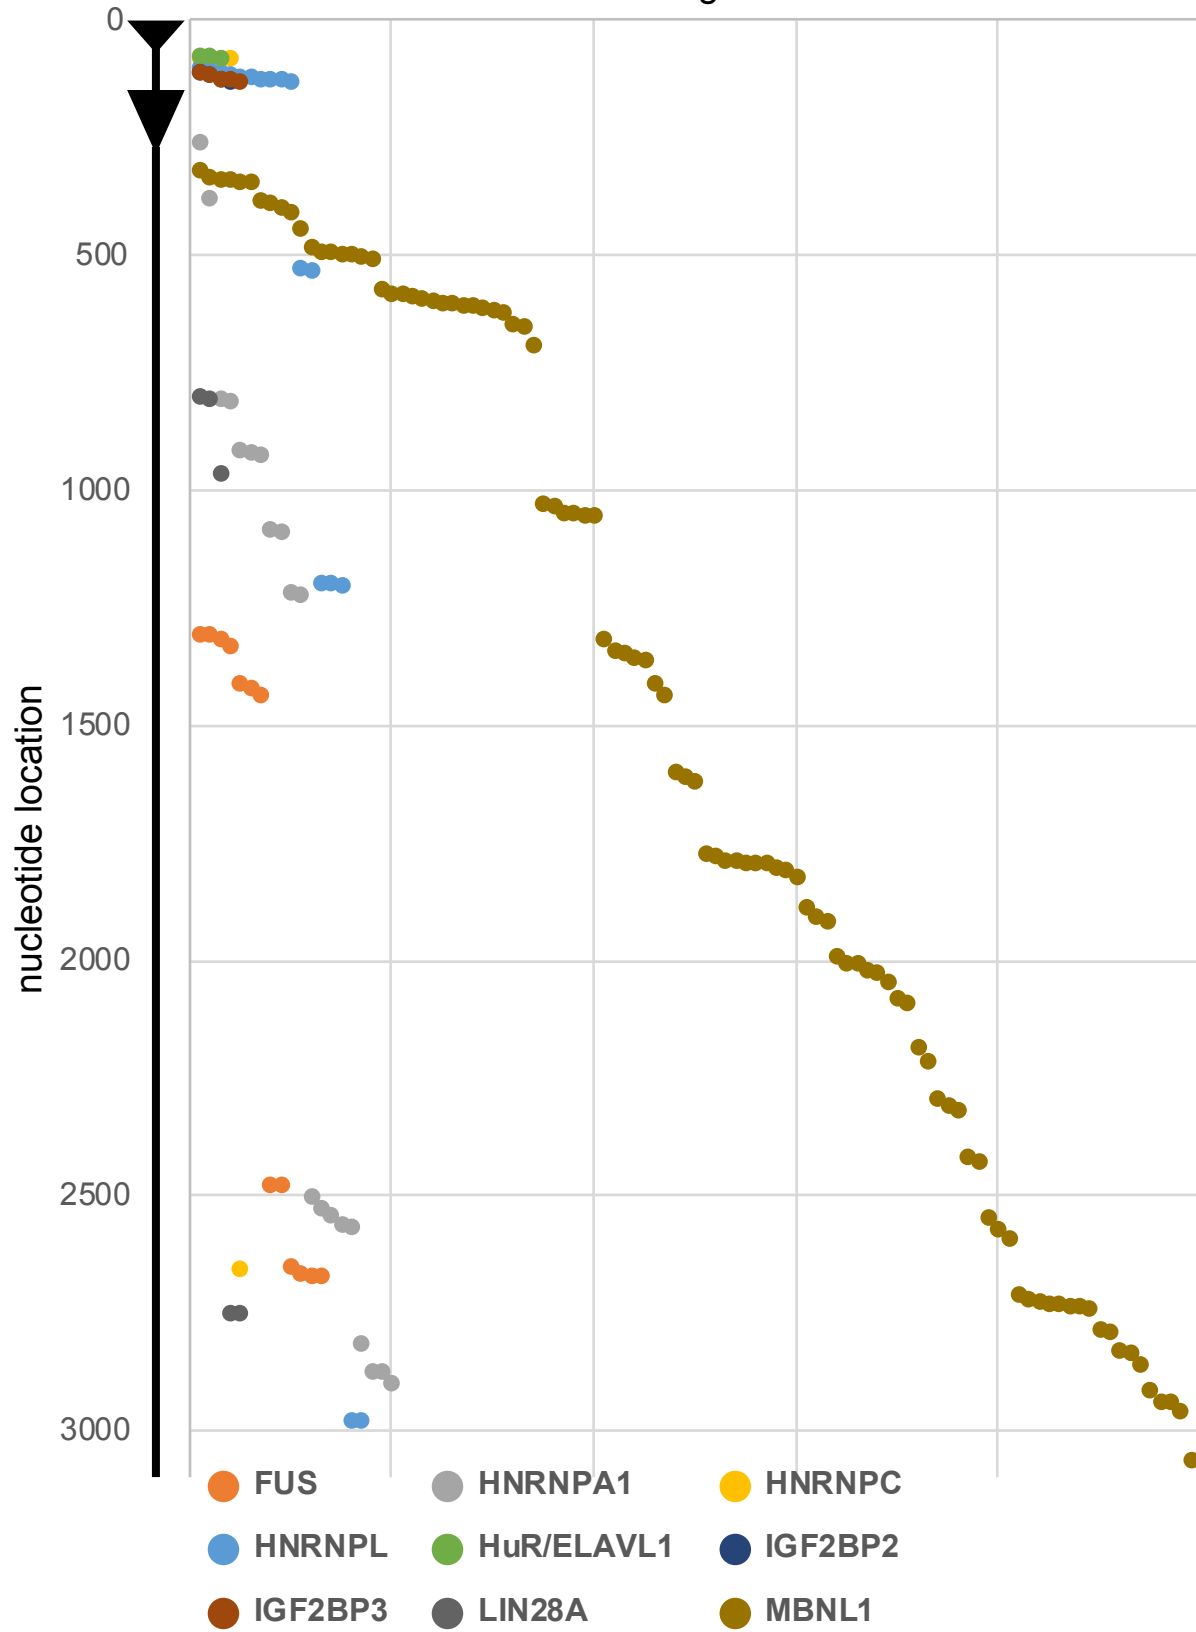

Supplement: 13104_2018_3250_MOESM6_ESM.pdf [file 13104_2018_3250_MOESM6_ESM.pdf]
